# Supplementary material for: Induction of miR-665-3p Impairs the Differentiation of Myogenic Progenitor Cells by Regulating the TWF1-YAP1 Axis
Source: MDPI journal article supplement (doi:10.3390/cells12081114), 2023-04-08
Supplement: s1 [file s1]

**Table S1. Oligonucleotide sequences for transfection**

| Gene                | Primer sequence (5'-3')  |
|---------------------|--------------------------|
| scRNA (control RNA) | UCACAACCUCCUAGAAAGAGUAGA |
| TWF1 siRNA (siTWF1) | CGUUACCAUUUCUUUCUGUUU    |
| miR-665-3p          | ACCAGGAGGCUGAGGCCCCU     |
| antimiR-665         | AGGGGCCUCAGCCUCCUGGU     |

**Table S2. Primer lists and conditions for *q*RT-PCR, RT-PCR, and cloning**

(A) Mouse primer lists for *q*RT-PCR and RT-PCR

| Gene  | Primer sequence (5′-3′) |                         | Product size | Annealing Temperature | Concentration |        | Cycle |
|-------|-------------------------|-------------------------|--------------|-----------------------|---------------|--------|-------|
|       |                         |                         |              |                       | cDNA          | Primer |       |
| U6    | F.P                     | CTCGCTTCGGCAGCACA       | 94           | 58                    | 2 ng/μl       | 0.5 μM | 40    |
|       | R.P                     | AACGCTTCACGAATTTGCGT    |              |                       |               |        |       |
| PCNA  | F.P                     | GAACCTGCAGAGCATGGACTC   | 201          | 58                    |               |        |       |
|       | R.P                     | GGTGTCTGCATTATCTTCAGCCC |              |                       |               |        |       |
| CCNB1 | F.P                     | GAGCTATCCTCATTGACTGG    | 125          | 58                    |               |        |       |
|       | R.P                     | CATCTTCTTGGGCACACAAC    |              |                       |               |        |       |
| CCND1 | F.P                     | ACCAATCTCCTCAACGACCG    | 228          | 58                    |               |        |       |
|       | R.P                     | ACGGAAGGGAAGAGAAGGG     |              |                       |               |        |       |

(B) Primer lists for wild-type and mutant 3'UTR cloning

| Gene                | Primer sequence (5'-3') |                           | Product size | Annealing Temperature | Concentration |        | Cycle |
|---------------------|-------------------------|---------------------------|--------------|-----------------------|---------------|--------|-------|
|                     |                         |                           |              |                       | cDNA          | Primer |       |
| TWF1 <sub>wt</sub>  | F.P                     | CCTAGAGAGATTTTGAGCCTC     | 649          | 58                    | 2 ng/μl       | 0.5 μM | 35    |
|                     | R.P                     | ATTCTGGAATGTCCATTAC       |              |                       |               |        |       |
| TWF1 <sub>mut</sub> | F.P                     | CCTAGAGAGATTTTGAGCCTC     | 502          |                       |               |        |       |
|                     | R.P                     | TGGTCTGCTCGTCGATTCTTAATGC |              |                       |               |        |       |
|                     | F.P                     | GCATTAAGAATCGACGAGCAGACCA | 178          |                       |               |        |       |
|                     | R.P                     | ATTCTGGAATGTCCATTAC       |              |                       |               |        |       |

**Table S3. Antibodies list**

| Antibody                              | Type       | Targeted species | Manufacturer                                          | Cat. No.   | Dilution ratio* |
|---------------------------------------|------------|------------------|-------------------------------------------------------|------------|-----------------|
| TWF1                                  | Polyclonal | Rabbit           | Proteintech, Rosemont, Illinois, USA                  | 11732-1-AP | 1:5,000         |
| MyHC                                  | Monoclonal | Mouse            | DSHB, Iowa, IA, USA                                   | MF20       | 1:1,000         |
| MyoD                                  | Monoclonal | Mouse            | Santa Cruz Biotechnology, Dallas, TX, USA             | sc-377460  | 1:1,000         |
| MyoG                                  | Monoclonal | Mouse            | Santa Cruz Biotechnology, Dallas, TX, USA             | sc-12732   | 1:1,000         |
| YAP1                                  | Monoclonal | Rabbit           | Cell Signaling Technology, Danvers, MA, USA           | 14074S     | 1:10,000        |
| p-YAP1                                | Polyclonal | Rabbit           | Cell Signaling Technology, Danvers, MA, USA           | 4911S      | 1:10,000        |
| Lamin B2                              | Monoclonal | Rabbit           | Abcam, Cambridge, United Kingdom                      | ab151735   | 1:2,500         |
| $\alpha$ -Tubulin                     | Monoclonal | Mouse            | DSHB, Iowa, IA, USA                                   | 12G10      | 1:2,000         |
| $\beta$ -actin                        | Monoclonal | Rabbit           | Sigma-Aldrich Chemical, St. Louis USA                 | A2066      | 1:10,000        |
| Antibodies HRP-linked anti-rabbit IgG |            |                  | Cell Signaling Technology, Danvers, MA, USA           | #7074      | 1:10,000        |
| Goat anti-mouse(H+L)                  |            |                  | Invitrogen, Thermofisher Scientific, Waltham, MA, USA | #32430     | 1:2,000         |

\*All blots were visualized using a Femto reagent (Thermofisher Scientific).

**Table S4. Diet composition**

(A) Normal fat diet (Purina Lab), Cat. 38057

| Calories (%) |        | Fat component of total fat (gram%) |                             |                       |
|--------------|--------|------------------------------------|-----------------------------|-----------------------|
|              |        | Saturated fatty acid               | Unsaturated Fatty acids     | Unidentified fat      |
| Fat          | 12.41% | Arachidonic Acid (4.42%)           | Omega-3 fatty acid (24.55%) | Unidentified (44.23%) |
| Carbohydrate | 63.07% |                                    | Linoleic acid (24.15%)      |                       |
| Protein      | 24.52% |                                    | Linolenic acid (2.65%)      |                       |
| Total        | 100%   | 4.42% of total fat                 | 51.35% of total fat         | 44.23% of total fat   |

(B) High fat diet (Research DYETS), Cat. D12492

| Calories (%) |      | Fat component of total fat (gram%)                                         |                                                                                                                                                                  |
|--------------|------|----------------------------------------------------------------------------|------------------------------------------------------------------------------------------------------------------------------------------------------------------|
|              |      | Saturated fatty acid                                                       | Unsaturated Fatty acids                                                                                                                                          |
| Fat          | 60%  | Palmitic acid (19.64)<br>Stearic acid (10.59%)<br>Myristoleic acid (1.10%) | Oleic acid (33.68%)<br>Linoleic acid (28.37%)<br>Linolenic acid (2.04%)<br>Arachidonic acid (1.78%)<br>Palmitoleic acid (1.33%)<br>Docosapentaenoic acid (0.78%) |
| Carbohydrate | 20%  | Lau acid (0.8%)<br>Margaric acid (0.35%)<br>Arachidic acid (0.16%)         |                                                                                                                                                                  |
| Protein      | 20%  | Pentadecanoic acid (0.08%)<br>Capric acid (0.04%)                          |                                                                                                                                                                  |
| Total        | 100% | 32% of total fat                                                           | 68% of total fat                                                                                                                                                 |
